# Supplementary material for: High performance carbon-coated hollow Ni12P5 nanocrystals decorated on GNS as advanced anodes for lithium and sodium storage
Source: Royal Society of Chemistry journal article supplement (doi:10.1039/c7ta06843c), 2017-01-01
Supplement: c7ta06843c1.pdf [file c7ta06843c1.pdf]

**Electronic Supplementary Material (ESI) for Journal of Materials Chemistry A.**  
**This journal is © The Royal Society of Chemistry 2017**

*Supporting Information for*

**High performance carbon-coated hollow Ni<sub>12</sub>P<sub>5</sub> nanocrystals  
decorated on GNS as advanced anodes for lithium and sodium  
storage**

*Huinan Guo,<sup>a</sup> Chengcheng Chen,<sup>ad</sup> Kai Chen,<sup>a</sup> Haichao Cai,<sup>a</sup> Xiaoya Chang,<sup>a</sup> Song Liu,<sup>a</sup> Weiqin Li,<sup>a</sup>*

*Yijing Wang<sup>\*ab</sup> and Caiyun Wang<sup>\*c</sup>*

<sup>a</sup>Key Laboratory of Advanced Energy Materials Chemistry (Ministry of Education). Nankai University, Tianjin  
300071, China.

<sup>b</sup>Collaborative Innovation Center of Chemical Science and Engineering, College of Chemistry, Nankai University,  
Tianjin 300071, China.

<sup>c</sup>Intelligent Polymer Research Institute, ARC Centre of Excellence for Electromaterials Science, University of  
Wollongong, Wollongong, NSW 2500, Australia.

<sup>d</sup>China Electronic Product Reliability and Environmental Testing Research Institute (CEPREI), Guangzhou  
510610, China.

<sup>\*</sup>Corresponding authors: [wangyj@nankai.edu.cn](mailto:wangyj@nankai.edu.cn) ; [caiyun@uow.edu.au](mailto:caiyun@uow.edu.au)

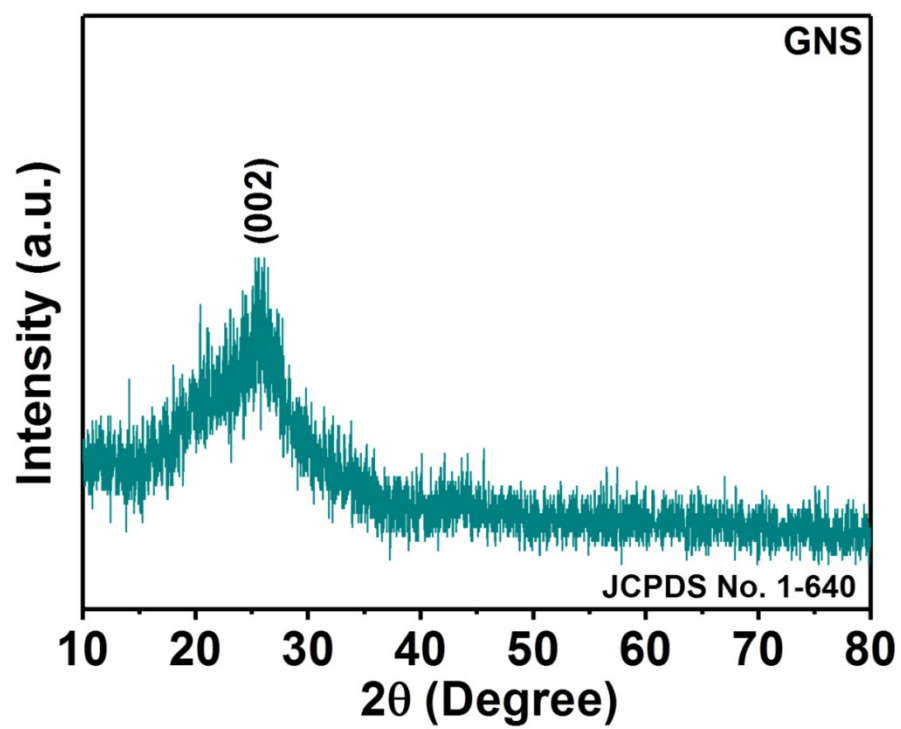

**Fig. S1** X-ray diffraction of pure GNS.

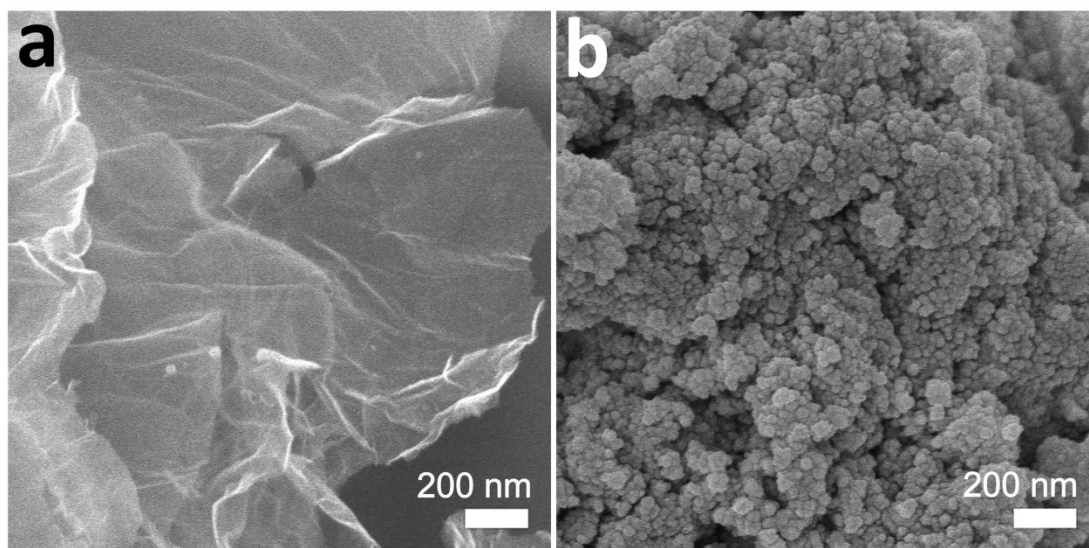

**Fig. S2** SEM images of (a) GNS and (b) pure  $\text{Ni}_{12}\text{P}_5@C$  nanocrystals.

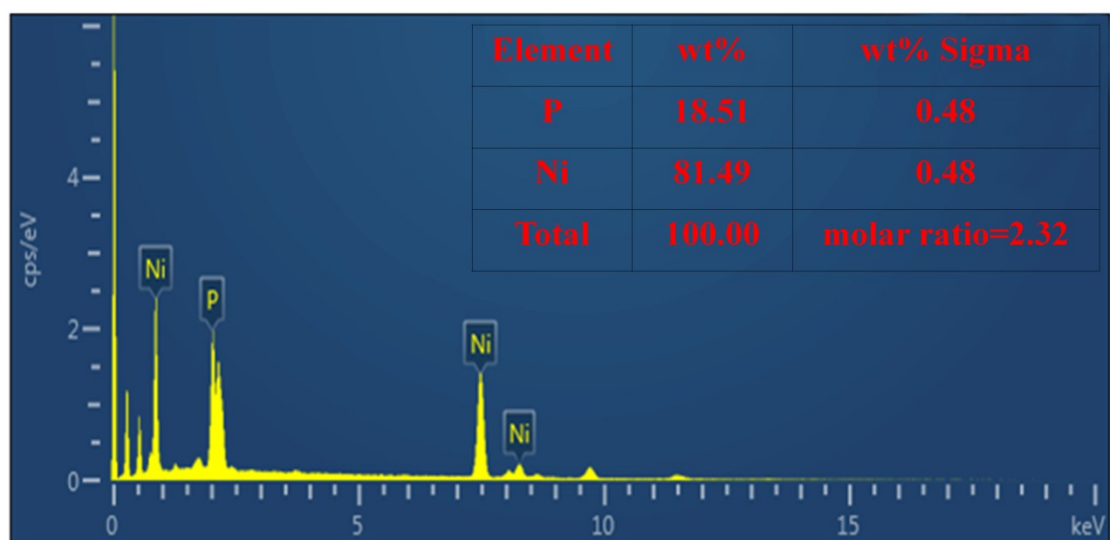

**Fig. S3** EDS spectrum of  $\text{Ni}_{12}\text{P}_5\text{@C/GNS}$  composite.

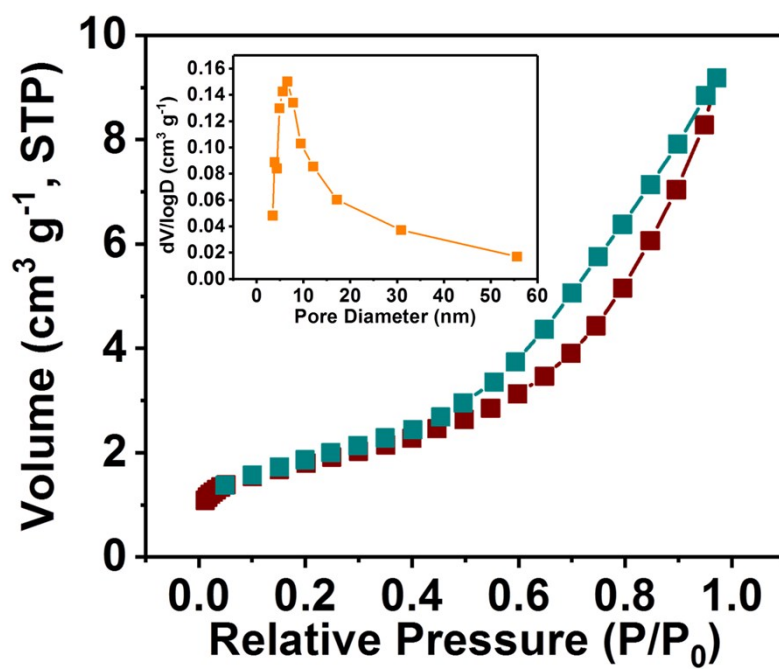

**Fig. S4** Nitrogen absorption/desorption isotherm of pure  $\text{Ni}_{12}\text{P}_5@\text{C}$  (wine: nitrogen adsorption curve; dark cyan: nitrogen desorption curve).

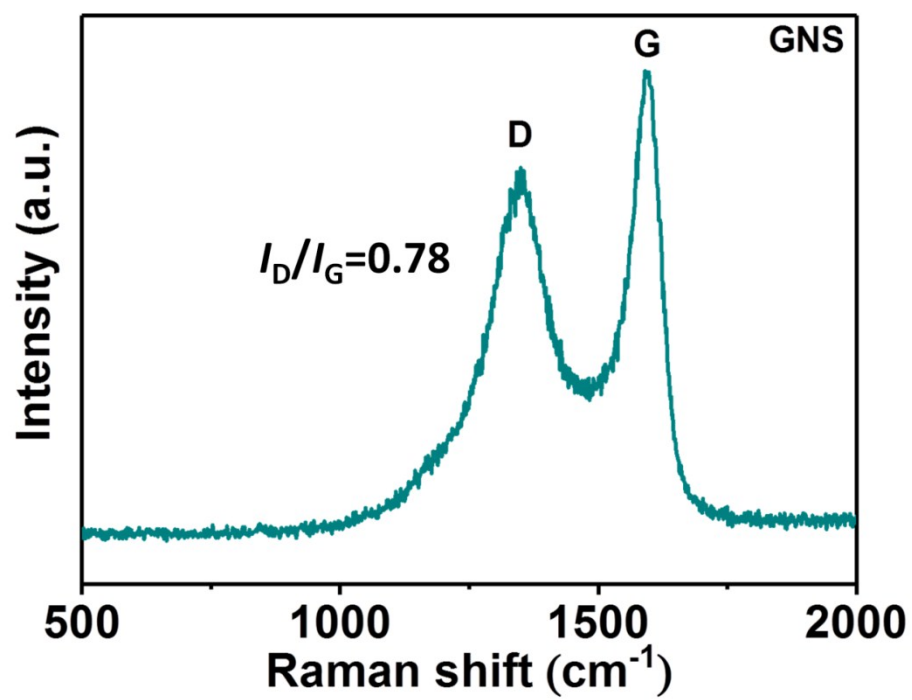

Fig. S5 Raman spectrum of Ni<sub>12</sub>P<sub>5</sub>@C/GNS.

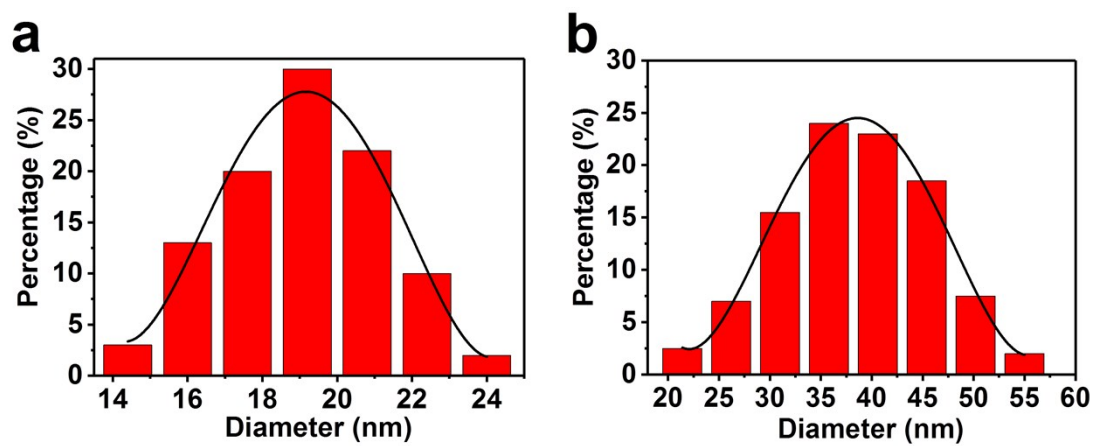

Fig. S6 Diameter distribution of (a) Pure  $\text{Ni}_{12}\text{P}_5@\text{C}$  and (b)  $\text{Ni}_{12}\text{P}_5@\text{C}/\text{GNS}$ .

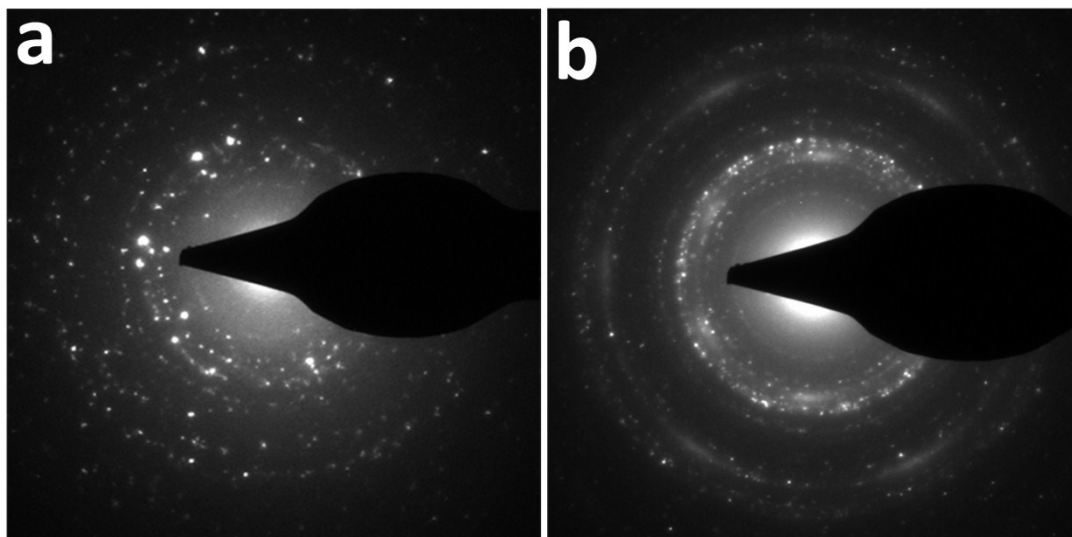

**Fig. S7** SAED patterns of (a) Pure  $\text{Ni}_{12}\text{P}_5@\text{C}$  and (b)  $\text{Ni}_{12}\text{P}_5@\text{C}/\text{GNS}$ .



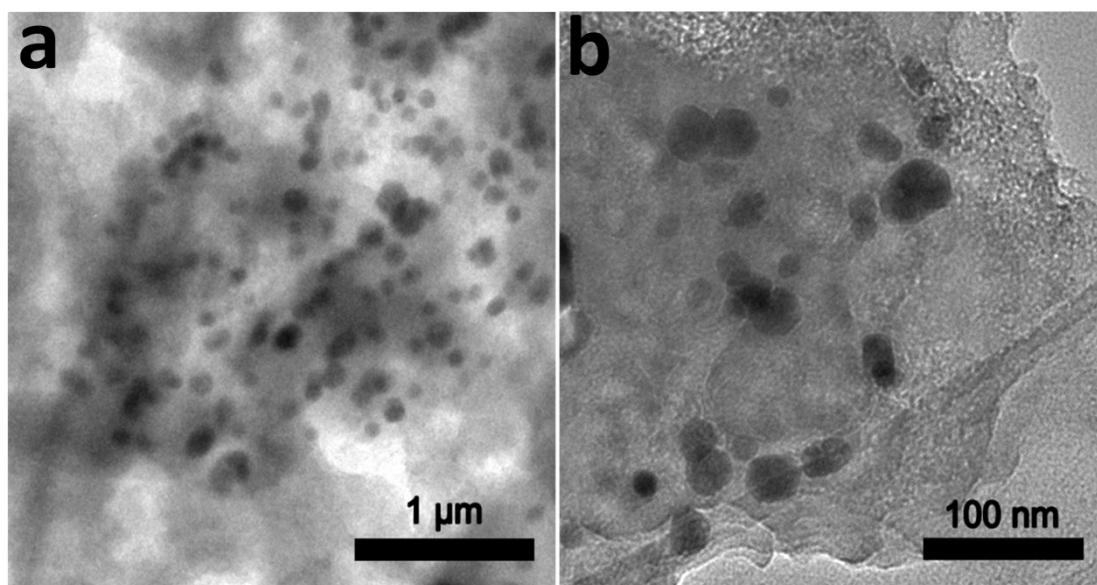

**Fig. S8** Different magnification TEM images of  $\text{Ni}_{12}\text{P}_5@\text{C}/\text{GNS}$  after 100 cycles.

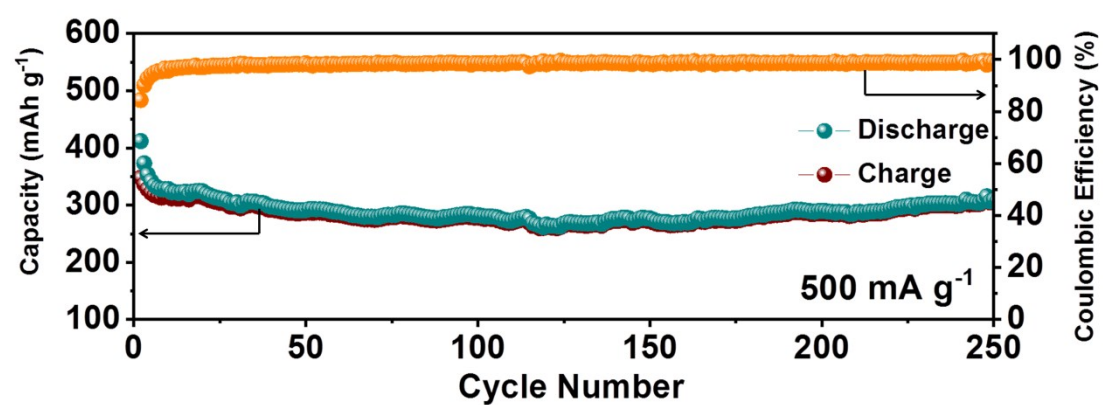

**Fig. S9** Long-term cycling performance and coulombic efficiency of the  $\text{Ni}_{12}\text{P}_5@\text{C}/\text{GNS}$  electrode for LIBs at  $500 \text{ mA g}^{-1}$ .
